# Supplementary material for: Data for tracking SDGs: challenges in capturing neonatal data from hospitals in Kenya
Source: PubMed Central journal article supplement (PMC7170465; doi:10.1136/bmjgh-2019-002108), 2020-03-31
Supplement: bmjgh-2019-002108supp002.pdf [file bmjgh-2019-002108supp002.pdf]

## Supplementary file 2: Selected articles on DHIS2 in Kenya (a) and identified policy documents (b)

**(a) Selected articles on DHIS2 in Kenya**

| #  | AUTHOR (year)          | TITLE                                                                                                                                                                                      |
|----|------------------------|--------------------------------------------------------------------------------------------------------------------------------------------------------------------------------------------|
| 1  | Manya et al. (2012)    | National Roll out of District Health Information Software (DHIS2) in Kenya, 2011 – Central Server and Cloud based Infrastructure                                                           |
| 2  | Karuri et al. (2013)   | Adoption of Health Information Systems by Health Workers in Developing Countries - Contextualizing UTAUT                                                                                   |
| 3  | Karuri et al. (2014)   | DHIS2: The Tool to Improve Health Data Demand and Use in Kenya                                                                                                                             |
| 4  | Kihuba et al. (2014)   | Assessing the ability of health information systems in hospitals to support evidence-informed decisions in Kenya                                                                           |
| 5  | Manya & Nielsen (2015) | The Use of Social Learning Systems in Implementing a Web-Based Routine Health Information System in Kenya                                                                                  |
| 6  | Oluoch et al. (2015)   | Do interoperable national information systems enhance availability of data to assess the effect of scale-up of HIV services on health workforce deployment in resource-limited countries?  |
| 7  | Kariuki et al. (2016)  | Automating indicator data reporting from health facility EMR to a national aggregate data system in Kenya: An Interoperability field-test using OpenMRS and DHIS2                          |
| 8  | Tuti et al. (2016)     | Improving documentation of clinical care within a clinical information network: an essential initial step in efforts to understand and improve care in Kenyan hospitals                    |
| 9  | Githinji et al. (2017) | Completeness of malaria indicator data reporting via the District Health Information Software 2 in Kenya, 2011 - 2015                                                                      |
| 10 | Maina et al. (2017)    | Using health-facility data to assess subnational coverage of maternal and child health indicators, Kenya                                                                                   |
| 11 | Maina et al. (2017)    | Coverage of routine reporting on malaria parasitological testing in Kenya, 2015 - 2016                                                                                                     |
| 12 | Okello et al. (2018)   | “Every day they keep adding new tools but they don’t take any away”: Producing indicators for intermittent preventive treatment for malaria in pregnancy (IPTp) from routine data in Kenya |
| 13 | Kuyo et al. (2018)     | Organizational Factors Influencing the Adoption of the District Health Information System 2 in Uasin Gishu County, Kenya                                                                   |
| 14 | Manya et al. (2018)    | Understanding the Effects of Decentralization on Health Information Systems in Developing Countries: A Case of Devolution in Kenya                                                         |
| 15 | Karuri et al. (2018)   | Perceived Impact of Devolved Health Services on Implementation of DHIS2 in Kenya: A Qualitative Study                                                                                      |
| 16 | Muinga et al. (2018)   | Implementing Open Source Electronic Health Record System in Kenyan Health Care Facilities: Case Study                                                                                      |
| 17 | Burnett et al. (2019)  | Introduction and Evaluation of an Electronic Tool for Improved Data Quality and Data Use during Malaria Case Management Supportive Supervision                                             |

**(b) Identified policy documents**

Published national health policy and strategy documents from 2010 – 2018 were collated from the website of the Kenyan Ministry of Health - earlier also called Ministry of Medical Services/ Ministry of Public Health and Sanitation (MMS/MPHS) - and reviewed.

| #  | PUBLICATION DATE          | DOCUMENT TITLE                                                                                             |
|----|---------------------------|------------------------------------------------------------------------------------------------------------|
| 23 | 2019                      | Policy Brief - Enhancing Health Information System for Evidence based decision making in the Health Sector |
| 22 | 2013                      | Report on the Baseline Assessment of Capacity for Monitoring and Evaluation                                |
| 21 | 2010                      | Standards and Guidelines for Electronic Medical Record Systems in Kenya                                    |
| 20 | 2018<br><i>presumably</i> | Health Sector Monitoring & Evaluation Framework<br>07/2014 – 06/2018                                       |
| 19 | 04/2017                   | Kenya Standards and Guidelines for mHealth Systems                                                         |
| 18 | 02/2017                   | Health Infrastructure Norms and Standards                                                                  |
| 17 | 2016                      | Kenya National eHealth Policy 2016-2030                                                                    |
| 16 | 05/2016                   | One Monitoring and Evaluation Framework for the Health Sector in Kenya                                     |
| 15 | 2016                      | The Kenya Health Enterprise Architecture (KHEA)                                                            |
| 14 | 2015                      | Kenya Health Workforce Report: The Status of Healthcare Professionals in Kenya, 2015                       |
| 13 | 2014                      | Kenya Health Policy 2014-2030                                                                              |
| 12 | 12/2014                   | Health sector Human Resources Strategy 2014-2018                                                           |
| 11 | 09/2014                   | An Assessment Report for Hospitals                                                                         |
| 10 | 2014                      | Kenya Health Sector Data Quality Assurance Protocol                                                        |
| 9  | 2014                      | Analysis of Performance, 2013/14                                                                           |
| 8  | 02/2013                   | NHIS Infrastructure Assessment Report                                                                      |
| 7  | 02/2013                   | Implementing the District Health Information Systems v.2                                                   |
| 6  | 2013                      | Kenya Service Availability and Readiness Assessment Mapping (SARAM) Report                                 |
| 5  | 2012                      | The Kenya Health Sector Strategic and Investment Plan (KHSSP)                                              |
| 4  | 05/2011                   | Kenya Service Provision Assessment Survey 2010 (KSPA)                                                      |
| 3  | 04/2011                   | Kenya National e-Health Strategy 2011 – 2017                                                               |
| 2  | 2011                      | Report on the Review of EMR Systems Towards Standardization                                                |
| 1  | 2010                      | Health Information System Policy 2010 -2030                                                                |
